# Supplementary material for: Adsorptive removal of uranium(vi) from wastewater using a crosslinked amidoxime-functionalized β-cyclodextrin polymer
Source: Royal Society of Chemistry journal article supplement (doi:10.1039/d2nj04046h), 2022-01-01
Supplement: d2nj04046h1.pdf [file d2nj04046h1.pdf]

## Supplementary Material

### Adsorptive removal of uranium (VI) from wastewater using a crosslinked amidoxime-functionalized $\beta$ -cyclodextrin polymer

Xing Zhong,<sup>a</sup> Ruodi Wang,<sup>a</sup> Guohao Xu,<sup>a</sup> Kai Guo<sup>a</sup> and Caixia Hu<sup>\*a</sup>

<sup>a</sup> State Key Laboratory for Nuclear Resources and Environment, School of Chemistry, Biology and Materials Science, East China University of Technology, Nanchang, Jiangxi 330013, China.

\* Corresponding authors.

E-mail addresses: hezhou8@foxmail.com (C. Hu).

#### Contents

Fig. S1 XRD spectrum of  $\beta$ -CDP-AO,  $\beta$ -CDP. and monomers

Fig. S2 Effect of NaCl concentration on removal efficiency,  $C_0=40\text{mg/L}$ ,  $\text{pH}=6.0$ ,  
 $m/V=0.4\text{g/L}$ ,  $t=720\text{min}$ ,  $T=303\text{K}$ .

Fig. S3 Relationship between  $\ln K_d$  and  $1/T$ .

Table S1 The adsorption thermodynamic parameters of U(VI) onto  $\beta$ -CDP and  $\beta$ -CDP-AO.

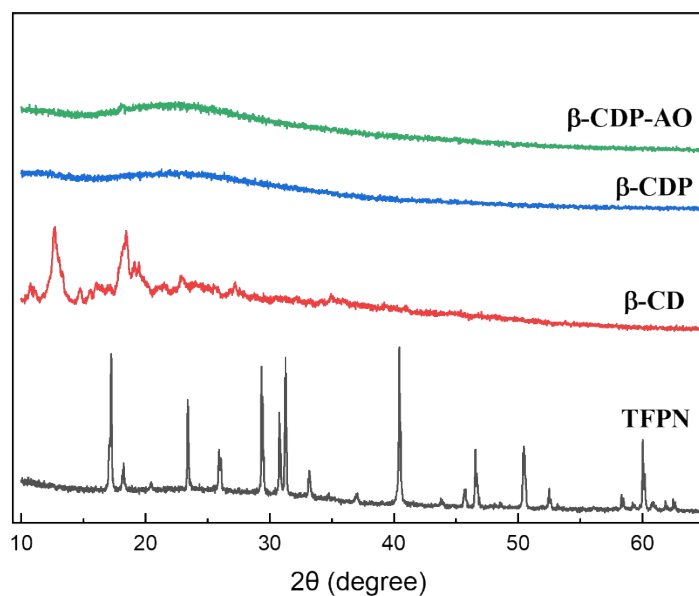

**Fig. S1.** XRD spectrum of  $\beta$ -CDP-AO,  $\beta$ -CDP. and monomers.

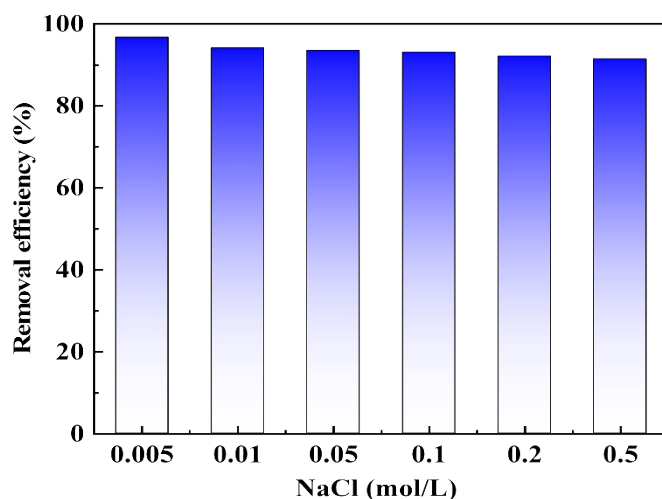

**Fig.S2.** Effect of NaCl concentration on removal efficiency,  $C_0=40\text{mg/L}$ ,  $\text{pH}=6.0$ ,  $m/V=0.4\text{g/L}$ ,  $t=720\text{min}$ ,  $T=303\text{K}$ .

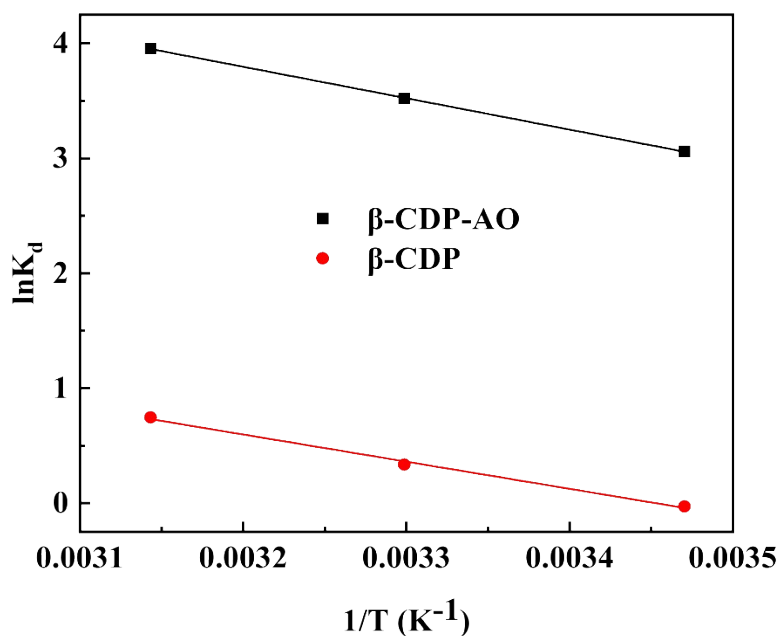

**Fig.S2.** Relationship between  $\ln K_d$  and  $1/T$ .

**Table S1.** The adsorption thermodynamic parameters of U(VI) onto  $\beta\text{-CDP}$  and  $\beta\text{-CDP-AO}$ .

| Adsorbent             | $\Delta G^0$ (KJ/mol) |       |        | $\Delta H^0$ (KJ/mol) | $\Delta S^0$ (J/mol.K) |
|-----------------------|-----------------------|-------|--------|-----------------------|------------------------|
|                       | 288K                  | 303K  | 318K   |                       |                        |
| $\beta\text{-CDP}$    | -0.68                 | -0.85 | -1.97  | 1.95                  | 67.83                  |
| $\beta\text{-CDP-AO}$ | -7.33                 | -8.18 | -10.46 | 2.27                  | 104.29                 |
